# Supplementary material for: Isolation of Garlic Bioactives by Pressurized Liquid and Subcritical Water Extraction
Source: Molecules. 2023 Jan 2;28(1):369. doi: 10.3390/molecules28010369 (PMC9822463; doi:10.3390/molecules28010369)
Supplement: Supplementary file 1 [file molecules-28-00369-s001.zip › molecules-2105718-supplementary.pdf]

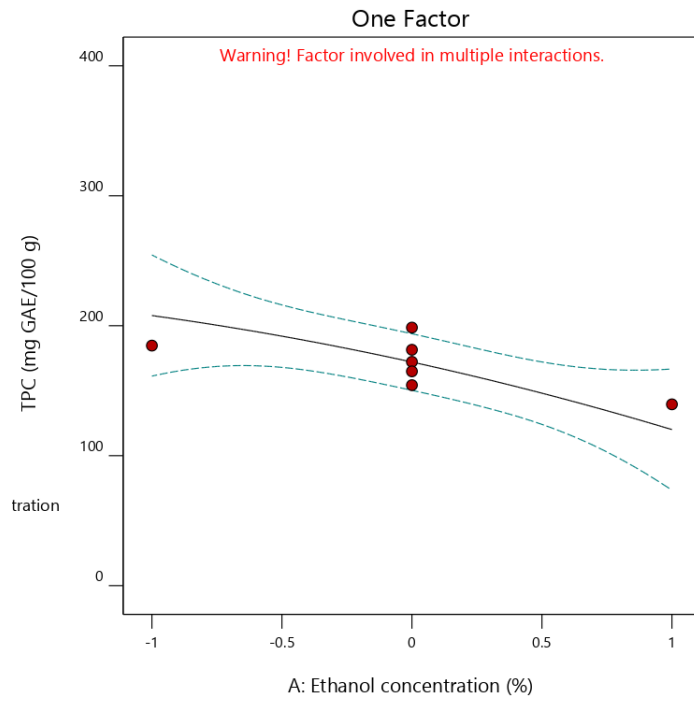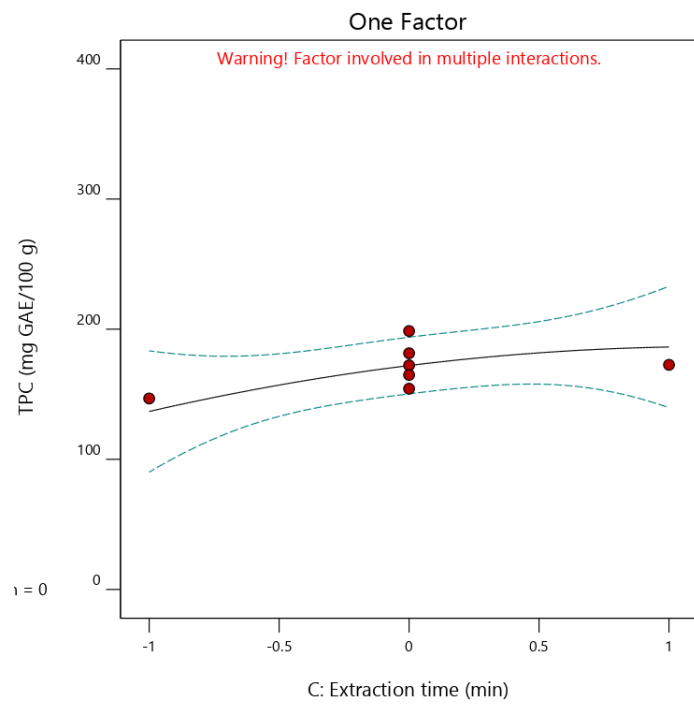

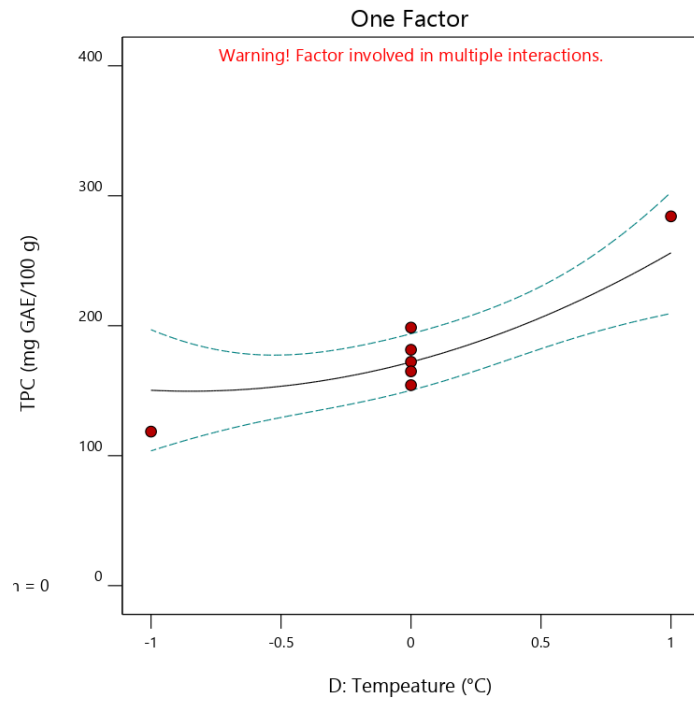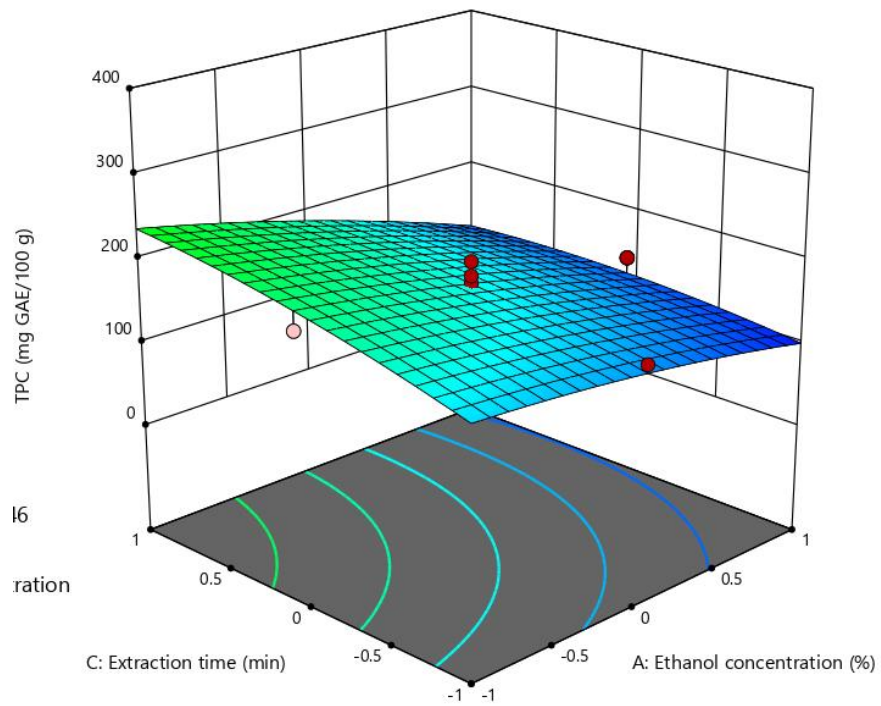

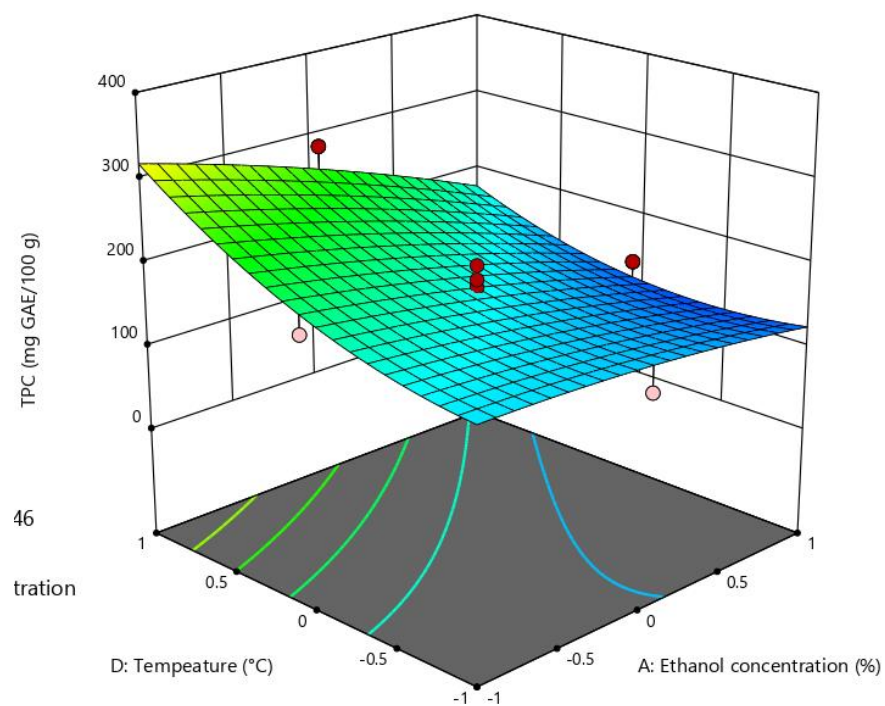

Figure S1. Influence of pressurized liquid extraction parameters on total polyphenol content in garlic extracts

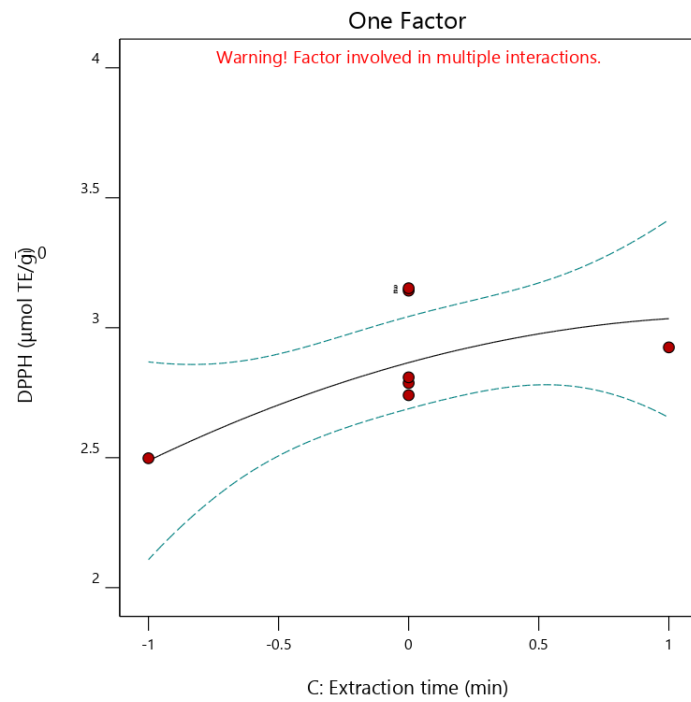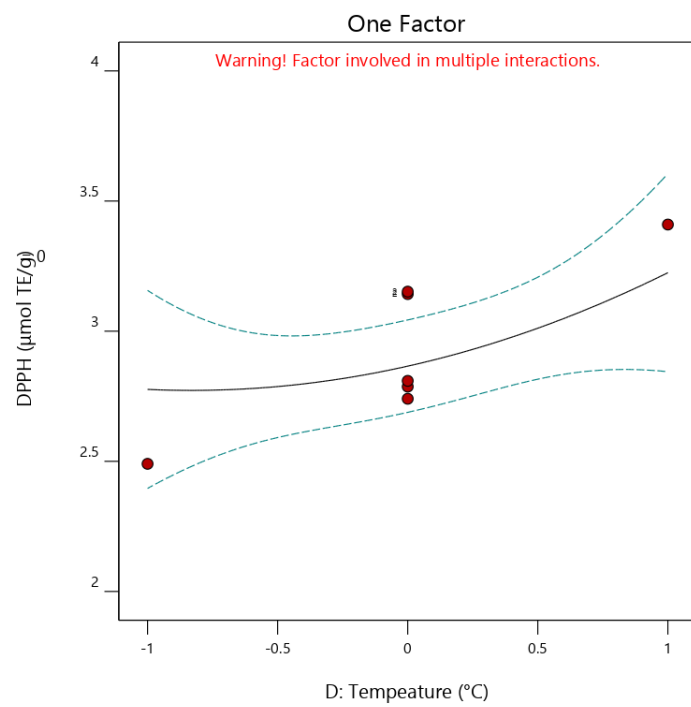

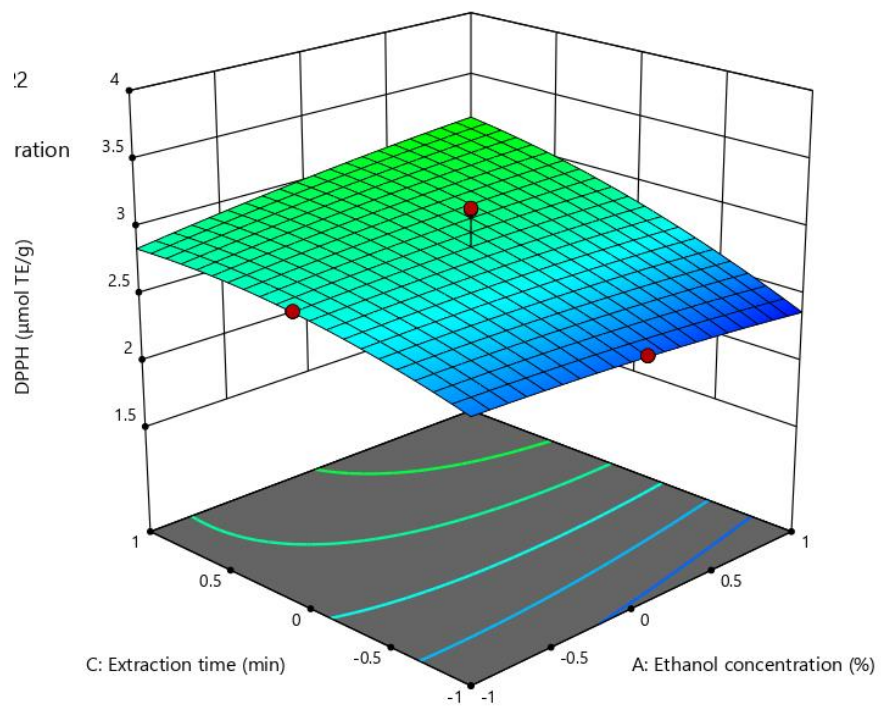

Figure S2. Influence of pressurized liquid extraction parameters on DPPH $\cdot$  scavenging activity in garlic extracts

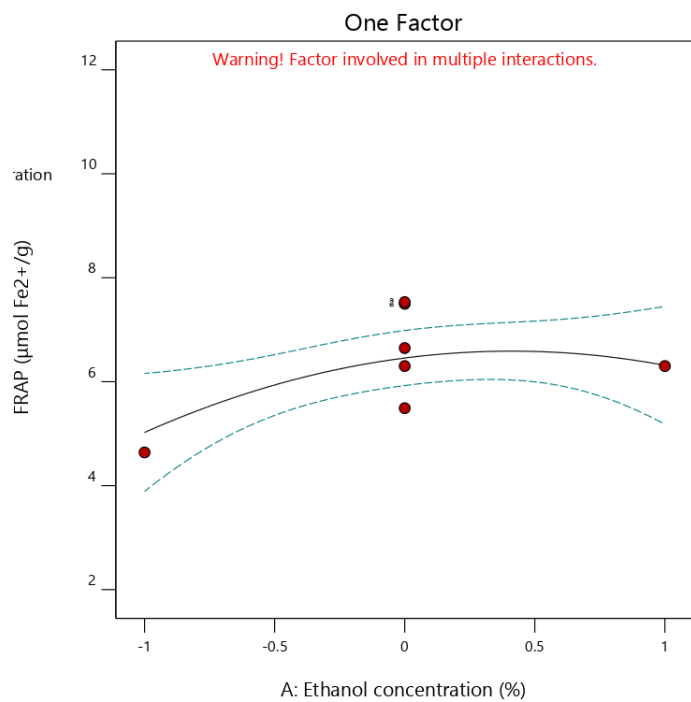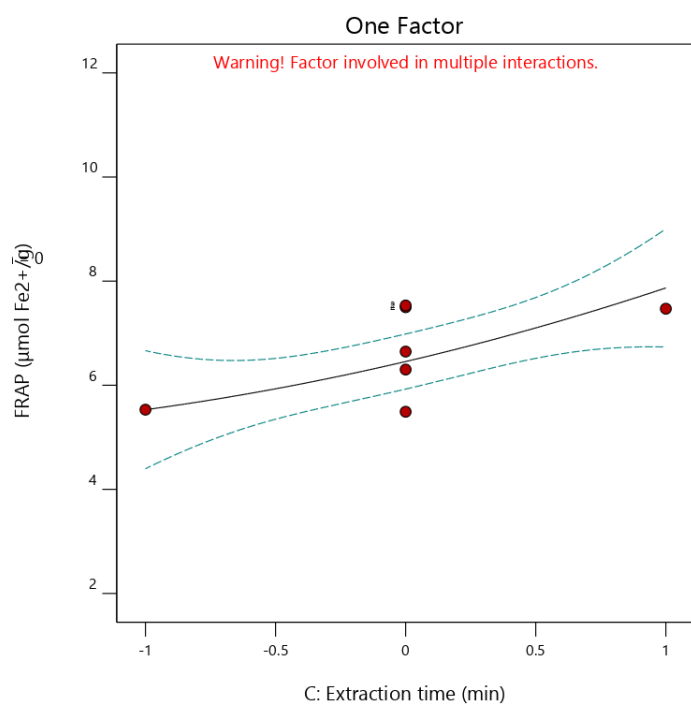

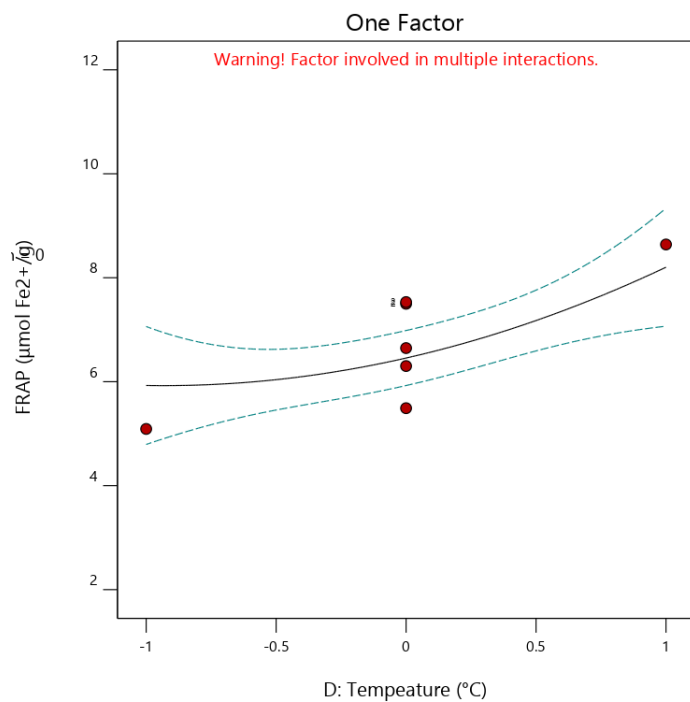

Figure S3. Influence of pressurized liquid extraction parameters on ferric reducing power in garlic extracts

Table S1. Gradient conditions for determination of AC content

| Time (min) | % B  |
|------------|------|
| 0.01       | 20   |
| 0.50       | 20   |
| 10.00      | 98   |
| 11.50      | 98   |
| 12.50      | 20   |
| 15.50      | Stop |
